# A climosequence of chronosequences in southwestern Australia

Benjamin L. Turner<sup>1,2\*</sup>, Patrick E. Hayes<sup>2</sup>, Etienne Laliberté<sup>3,2</sup>

<sup>1</sup>Smithsonian Tropical Research Institute, Apartado 0843-03092, Balboa, Ancon, Republic of Panama

<sup>2</sup>School of Biological Sciences, The University of Western Australia, 35 Stirling Highway, Crawley, Perth, WA 6009, Australia

<sup>3</sup>Centre sur la biodiversité, Institut de recherche en biologie végétale, Département de sciences biologiques, Université de Montréal, 4101 Sherbrooke Est, Montréal H1X 2B2, Canada

\*Corresponding author: TurnerBL@si.edu

## Abstract

To examine how climate affects soil development and nutrient availability over long timescales, we studied a series of four long-term chronosequences along a climate gradient in southwestern Australia. Annual rainfall ranged from 533 mm to 1185 mm (water balance from -900 mm to +52 mm) and each chronosequence included Holocene ( $\leq 6.5$  ka), Middle Pleistocene (120–500 ka), and Early Pleistocene (~2000 ka) dunes. Vegetation changed markedly along the climosequence, from shrubland at the driest site to *Eucalyptus* forest at the wettest. The carbonate and P content of the parent sand declined along the climosequence, presumably linked to variation in offshore productivity. However, soil development and associated nutrient status followed remarkably consistent patterns along the four chronosequences. Pedogenesis involved decalcification and secondary carbonate precipitation in Holocene soils and leaching of iron oxides from Middle Pleistocene soils, ultimately yielding bleached quartz sands on the oldest soils. Along all chronosequences soil pH and total P declined, while C:P and N:P ratios increased, consistent with the predicted shift from N to P limitation of vegetation during ecosystem development. The expected unimodal pattern of leaf area index was most pronounced along wetter chronosequences, suggesting an influence of climate on the expression of retrogression. The four chronosequences do not appear to span a pedogenic climate threshold, because exchangeable phosphate and base cations declined consistently during long-term pedogenesis. However, the proportion of the total P in organic form was greater along wetter chronosequences. We conclude that soils and nutrient availability on the coastal sand plains of southwestern Australia change consistently during long-term pedogenesis, despite marked variation in modern vegetation and climate. The four chronosequences provide a rare soil-age  $\times$  climate framework within which to study long-term ecosystem development.

## 40 Introduction

41

42 Pedogenesis over thousands to millions of years involves marked changes in nutrient availability  
43 (Vitousek, 2004). In particular, nitrogen (N) increases in the early stages of ecosystem development  
44 through biological N fixation, whereas phosphorus (P) availability declines continuously as P is lost by  
45 leaching at a greater rate than it is replenished by weathering or atmospheric inputs (Walker &  
46 Syers, 1976). This drives a long-term shift from N to P limitation of plant biomass and productivity  
47 (Vitousek & Farrington, 1997; Wardle *et al.*, 2004; Laliberté *et al.*, 2012), which is reflected in marked  
48 changes in the diversity and function of plant and microbial communities (Williamson *et al.*, 2005;  
49 Jangid *et al.*, 2013; Laliberté *et al.*, 2013; Zemunik *et al.*, 2015).

50

51 Rates of pedogenesis and nutrient depletion influenced markedly by climate (Chadwick & Chorover,  
52 2001; Selmants & Hart, 2010; Feng *et al.*, 2016). Assuming other soil-forming factors are held  
53 constant (i.e. topography, parent material, and vegetation), wetter sites are expected to lose rock-  
54 derived nutrients at a greater rate than comparable drier sites due to accelerated weathering and  
55 greater leaching losses. However, vegetation typically co-varies with climate and might mitigate  
56 nutrient loss. For example, wetter sites tend to support greater plant biomass than drier sites,  
57 retaining nutrients in the system and reducing the rate of nutrient loss by leaching, at least when  
58 precipitation is in balance with potential evapotranspiration (Porder & Chadwick, 2009). In contrast,  
59 arid ecosystems lose nutrients more slowly through reduced leaching but support little plant  
60 biomass, and therefore have a limited potential to retain nutrients over long timescales. In other  
61 words, plants might be able to influence the rate of nutrient loss during pedogenesis depending on  
62 the extent to which they retain nutrients in the plant-soil system, which itself depends on climate  
63 (Porder & Chadwick, 2009).

64

65 Despite the significance of this soil development model to our understanding of terrestrial nutrient  
66 cycling, it has been tested only once (Porder & Chadwick, 2009). This is because doing so requires  
67 multiple long-term soil chronosequences that are similar in terms of parent material, topography,  
68 and time, yet that differ in terms of potential evapotranspiration, precipitation, and water balance.  
69 Model systems that meet these strict requirements are exceedingly rare – so far only the well-  
70 studied Hawaiian Island sequence has been suitable. Porder and Chadwick (2009) studied three  
71 basalt lava flows on Hawaii varying from 10,000 to 350,000 years old, with annual precipitation  
72 ranging from 500 to 2500 mm. At relatively dry sites (< 750 mm annual rainfall) where  
73 evapotranspiration exceeded precipitation, plants slowed nutrient loss, but the effect was small  
74 since there was little plant biomass. At intermediate rainfall sites (750–1400 mm) where potential  
75 evapotranspiration exceeded precipitation (i.e., negative water balance), plants uplift of nutrients  
76 enriched the soil surface with P for at least 350,000 years, effectively compensating for leaching  
77 losses. In contrast, at the wettest sites (>1500 mm annual rainfall) where precipitation exceeded  
78 evapotranspiration (i.e., positive water balance), leaching losses overwhelmed the capacity of plants  
79 to retain nutrients after 350,000 years of pedogenesis, despite greater biomass. Indeed, on much  
80 older soils (Oxisols approximately 4 million years old) this ‘high rainfall’ process domain (see below)  
81 occurred above about 900 mm of annual rainfall (compared to 1500 mm on younger soils),  
82 presumably reflecting long-term depletion of P, reduced productivity, and therefore a reduced  
83 capacity of the ecosystem to retain nutrients against leaching losses (Vitousek & Chadwick, 2013a).  
84 The influence of plants on nutrient retention therefore appears to be strongest where potential

85 evapotranspiration is roughly in balance with precipitation, although this can be overridden on  
86 strongly weathered soils when extreme P limitation reduces the capacity of plants to retain nutrients  
87 in the ecosystem.

88

89 The rainfall zones described by Porder and Chadwick (2009) for P dynamics reflect the balance  
90 between precipitation and evapotranspiration, and correspond to 'soil process domains' (Vitousek &  
91 Chadwick, 2013a), defined as climate zones within which soils appear to change relatively little  
92 across broad variation in rainfall. The domains are separated by pedogenic thresholds, where soil  
93 properties vary abruptly across a relatively short variation in rainfall (Chadwick & Chorover, 2001).  
94 For basaltic soils on Hawaii subject to about 150,000 years of pedogenesis, the process domains  
95 correspond to soils where evapotranspiration exceeds precipitation and carbonate accumulation  
96 dominates pedogenesis (low rainfall < 700 mm), a domain where evapotranspiration is slightly  
97 greater than precipitation (700 to 1500 mm) and plant uplift and retention of nutrients can  
98 compensate for leaching losses, a wetter domain (1500 to 2500 mm) where precipitation exceeds  
99 evapotranspiration and pedogenesis is dominated by the accumulation of metal oxides (Chadwick *et*  
100 *al.*, 2003), and a very wet domain (> 2500 mm) where saturation causes iron to be solubilised and  
101 lost via reduction and leaching (Chadwick & Chorover, 2001; Vitousek & Chadwick, 2013a). Above  
102 the threshold where precipitation exceeds evapotranspiration the soils exhibit a decline in pH, a  
103 decline in base cations and base saturation, and an increase in exchangeable Al (Chadwick *et al.*,  
104 2003). These changes are linked to the depletion of primary minerals and leaching at a greater rate  
105 than replenished by weathering.

106

107 Here we report a study of a series of four long-term (Early Pleistocene) chronosequences along a  
108 rainfall gradient in southwestern Australia. Our recent study of soil development along the Jurien  
109 Bay chronosequence in Western Australia, corresponding to the driest chronosequence in the  
110 present study, shows a characteristic pattern of soil development, with decalcification of young  
111 carbonate-rich dunes, formation of a petrocalcic horizon, and leaching of iron oxide coatings on sand  
112 grains leaving bleached quartz sands many meters deep (Turner & Laliberté, 2015). These changes  
113 correspond with marked depletion of soil P and other nutrients, leading to some of the most infertile  
114 soils in the world on the oldest dunes. Here we extend our Jurien Bay work to similar coastal dune  
115 deposits extending hundreds of kilometers south along a strong climate gradient, allowing us to  
116 identify three additional long-term soil chronosequences with similar aged dunes but contrasting  
117 water balance. Our aim was to use this climosequence of chronosequences along the coast of  
118 southwestern Australia to examine how climate influences soil development and nutrient availability  
119 during long-term pedogenesis.

120

## 121 **Materials and Methods**

122

### 123 *Regional overview and description of the chronosequences*

124

125 A series of dune deposits occur along parallel to the coast of southwestern Australia, running for  
126 approximately 400 km from Geraldton in the north to Dunsborough in the south (Fig. 1). Known as  
127 the Swan Coastal Plain, the dunes were formed by periodic interglacial sea-level high stands since  
128 the Early Pleistocene or Late Pliocene (*i.e.* 2.59 million years ago) (Kendrick *et al.*, 1991). An  
129 additional area of dunes along the southern coastline near Pemberton and Northcliffe, the Scott

130 Coastal Plain, is assumed to correspond to the main dune deposits on the Swan Coastal Plain  
131 (Playford *et al.*, 1976). The dunes and their associated soils are grouped into three main units  
132 according to the underlying parent sand deposits (McArthur & Bettenay, 1974; Playford *et al.*, 1976).  
133 The Quindalup dunes of Holocene age (up to 6500 years old) and correspond with the Safety Bay  
134 Sand, the Spearwood dunes are of Middle Pleistocene age (120,000 to 500,000 years old) and  
135 correspond with the Tamala Limestone, and the Bassendean dunes are Late Pleistocene in age  
136 (approximately 2 million years old) and correspond with the Bassendean Sand.

137

138 We previously identified and studied the Jurien Bay chronosequence, located 200 km north of Perth  
139 and receiving approximately 530 mm annual rainfall (Fig. 1, 2A) (Laliberté *et al.*, 2012; Hayes *et al.*,  
140 2014; Laliberté *et al.*, 2014; Turner & Laliberté, 2015; Zemunik *et al.*, 2015; 2016). We now identify  
141 three additional chronosequences spanning a strong climate gradient along the coastline. These  
142 chronosequences are located near Guilderton, approximately 75 km north of Perth (Fig. 2B),  
143 Yalgorup National Park, approximately 100 km south of Perth (Fig. 2C), and at Warren Beach, south  
144 of Pemberton and approximately 300 km south of Perth (Fig. 2D). Along each of the three new  
145 chronosequences we delineated six to seven chronosequence stages: Holocene (stages 1-3), three  
146 Middle Pleistocene (stages 4, 5, or 5a and 5b), and one Early Pleistocene (stage 6). In the three drier  
147 chronosequences of the Swan Coastal Plain (Jurien Bay, Guilderton, Yalgorup) these stages  
148 correspond to the Quindalup (Holocene), Spearwood (Middle Pleistocene) and Bassendean (Early  
149 Pleistocene) dunes (Fig. 2A-C) described by McArthur (2004). On the other hand, the first six stages  
150 of the Warren chronosequence are classified as Meerup sand or podzols (Fig. 2D), while the oldest  
151 stage is mapped as the Cleave series (Purdie *et al.*, 2004).

152

153 Although precise ages of dune formation are not known for any of the chronosequence stages,  
154 various lines of evidence support the chronology ranging from the Holocene to the Early Pleistocene  
155 (see Turner and Laliberté 2015 for a review). We assume that the broad chronology of dune  
156 formation and the relative spatial configuration of dunes are consistent along the entire Swan  
157 Coastal Plain (Playford *et al.*, 1976; McArthur, 2004). We also assume that the Swan Coastal Plain  
158 chronology is broadly comparable to the main stages of dune formation along the Warren  
159 chronosequence (Playford *et al.*, 1976), given that the formation of the main coastal dunes in the  
160 region has been driven by the same sea-level high stands during interglacial periods throughout the  
161 Pleistocene (Kendrick *et al.*, 1991). Thus, time is constrained only within the limits of our broad  
162 estimates about timing of dune formation.

163

#### 164 *Climate along the chronosequences*

165

166 Regional variation in precipitation is mapped in Figure 1, while climate data for the four  
167 chronosequences are shown in Table 1 and Figure 1. Mean annual rainfall increases from 533 mm at  
168 Jurien Bay in the north to 1185 mm at Warren in the south. The dry season, defined as the number  
169 of months receiving < 30 mm of rainfall, varies from two months at Warren Beach to seven months  
170 at Jurien Bay. Mean annual temperature varies from 15.2°C at Warren in the south to 19.0°C at  
171 Jurien Bay in the north. Mean monthly minimum temperatures (January/February) are 10.1°C at  
172 Warren and 13.1°C at Jurien Bay, while mean monthly maximum temperatures (July) are 20.3°C at  
173 Warren and 25.6°C at Guilderton. The calculated annual potential evapotranspiration ranges from

174 1133 mm at Warren Beach to 1433 mm at Jurien Bay, reflected in water balances ranging from – 900  
175 mm at Jurien Bay to + 52 mm at Warren.

176

177 There is little information on paleoclimate for the four sequences, although it has been argued that  
178 the Swan Coastal Plain has been climatically buffered over the lifespan of the sequences (Wyrwoll *et*  
179 *al.*, 2014). In particular, Karri trees (*Eucalyptus diversicolor*) and other moisture sensitive plants in  
180 the far southwest of the region did not disappear despite arid conditions further inland.

181

182 In Soil Taxonomy, soil moisture and temperature regimes are defined by the control section  
183 between 30 and 90 cm in sandy textured soils (Soil Survey Staff, 1999). We do not have soil  
184 temperature data for the chronosequences, but can estimate soil temperature regimes from air  
185 temperatures at nearby stations. Mean annual air temperature varies between 15.2°C at Pemberton  
186 (approximately 18 km from the Warren chronosequence) and 19.0°C at Jurien Bay, and for all  
187 sequences the difference between the minimum and maximum mean monthly temperature is > 6°C.  
188 The soil temperate regime is therefore Thermic for all four chronosequences. Despite the marked  
189 variation in rainfall and potential evapotranspiration along the climate gradient, the four  
190 chronosequences all under a xeric moisture regime, because the soil is dry for at least 45 days in  
191 summer, wet for at least 45 days in the winter, and moist for more than half the year in total. The  
192 latter is marginal at Jurien Bay, where precipitation exceeds evapotranspiration for at least six  
193 months of the year. In the eeric moisture regime rainfall is particularly effective for leaching,  
194 because it occurs in the winter when potential evapotranspiration is lowest.

195

#### 196 *Soil sampling*

197

198 A profile pit was excavated on each of six (Jurien Bay) or seven (all other chronosequences) stages  
199 along each chronosequence (Fig. 2). Profile pits were located on the shoulders or upper slopes of  
200 dunes, except for the stage-6 profile where dune morphology was indistinct. Pits were at least 1 m  
201 deep, and up to 2 m deep on older dunes. Deeper soils were sampled by augering through the pit  
202 floor as necessary. However, deep augering was often constrained by dry and incohesive sand that  
203 was not retained in the auger, despite the frequent addition of water to the auger hole and the use  
204 of a specially designed sand auger (Dormer Soil Samplers, Murwillumbah South, New South Wales,  
205 Australia). Soils were described according to Soil Taxonomy (Soil Survey Staff, 1999) and the  
206 Australian Soil Classification System (Isbell, 2002) and samples taken from each horizon for bulk  
207 density and laboratory analysis. Profile descriptions and analytical data are presented in full in  
208 Supplementary Online Material.

209

210 To quantify changes in soil nutrients relevant to potential limitation of biological activity, we  
211 sampled surface soils (0–10 cm depth) in eighty 10 m × 10 m plots across the four chronosequences  
212 (*i.e.* 20 plots per chronosequence). In each chronosequence, we first selected five chronosequence  
213 stages (stages 1, 2, 3, 4 and 6) that represented a strong gradient of soil nutrient availability and of  
214 the type and strength of nutrient limitation, based on previous work conducted along the Jurien Bay  
215 chronosequence (Laliberté *et al.*, 2012; Hayes *et al.*, 2014; Turner & Laliberté, 2015) and on previous  
216 soil analyses by McArthur (2004). We excluded the older Spearwood dunes (stages 5a and 5b) from  
217 the surface soil sampling as there is relatively little variation in surface soil chemistry between older  
218 Spearwood and Bassendean soils (Turner & Laliberté, 2015). For the Jurien Bay chronosequence, we

219 randomly selected four existing plots used in previous studies (Laliberté *et al.*, 2012; Hayes *et al.*,  
220 2014; Laliberté *et al.*, 2014; Turner & Laliberté, 2015; Zemunik *et al.*, 2015). For the other three  
221 chronosequences, we positioned four replicate sampling plots in each of the five chronosequence  
222 stages at random positions near the profile pits, ensuring that replicate plots followed the same  
223 dune. Replicate plots within each chronosequence stage were >50 m apart. In each plot, we  
224 collected four soil samples to 20 cm depth using a 50-mm diameter sand auger. Those four soil  
225 samples were bulked and homogenised at the plot level prior to chemical analyses. The  
226 homogenised samples were sieved (<2 mm) to remove roots and other large organic debris and then  
227 air-dried prior to laboratory analyses.

228

### 229 *Soil analysis*

230

231 Soil analysis for profile pits and surface samples was identical to that described previously (Turner &  
232 Laliberté, 2015). Briefly, soil pH was determined in both deionised water and 10 mM CaCl<sub>2</sub> in a 1:2  
233 soil to solution ratio using a glass electrode. The concentrations of sand (53 µm–2 mm), silt (2 µm–  
234 53 µm), and clay (< 2 µm) sized particles were determined by the pipette method following  
235 pretreatment to remove soluble salts and organic matter (Gee & Or, 2002), with further separation  
236 of sand fractions by manual dry sieving. Total carbon (C) and N were determined by automated  
237 combustion and gas chromatography with thermal conductivity detection using a Thermo Flash 1112  
238 elemental analyser (CE Elantech, Lakewood, NJ). Total P was determined by ignition (550°C, 1 h) and  
239 extraction in 1 M H<sub>2</sub>SO<sub>4</sub> (16 h, 1:50 soil to solution ratio) (Walker & Adams, 1958). Exchangeable  
240 cations were determined by extraction in 0.1 M BaCl<sub>2</sub> (2 h, 1:30 soil to solution ratio), with detection  
241 by inductively-coupled plasma optical-emission spectrometry (ICP–OES) on an Optima 7300 DV  
242 (Perkin-Elmer Ltd, Shelton, CT) (Hendershot *et al.*, 2008). Carbonate was determined by mass loss  
243 after addition of 3 M HCl (Loeppert & Suarez, 1996) and organic C was calculated as the difference  
244 between total C and CaCO<sub>3</sub>-C. Bulk density was determined by taking three replicate cores of known  
245 volume per horizon using a 7.5 cm diameter stainless steel ring and determining the soil mass after  
246 drying at 105°C. Readily-exchangeable phosphate was determined by extraction with anion  
247 exchange membranes (resin P) (Turner & Romero, 2009). Total exchangeable bases (TEB) was  
248 calculated as the sum of Ca, K, Mg, and Na; effective cation exchange capacity (ECEC) was calculated  
249 as the sum of Al, Ca, Fe, K, Mg, Mn, and Na; base saturation was calculated by  $(TEB \div ECEC) \times 100$ .

250

### 251 *Leaf area index*

252

253 Leaf area index (LAI) was estimated in the same plots from which surface soils were collected using a  
254 portable plant canopy imager (CI-110, CID Bio-Science, Camas, WA, USA). We took four canopy  
255 images per plot, each separated by 7 m. Images were taken with the camera as close to possible to  
256 the ground surface to include low-stature vegetation and processed using the built-in software. Leaf  
257 area index was calculated using the gap-fraction inversion procedure.

258

### 259 *Statistical analysis*

260

261 Differences in soil properties among chronosequences and chronosequence stages were tested  
262 using generalised least squares models using the 'nlme' package in R (Pinheiro & Bates, 2000).  
263 Chronosequence and chronosequence stages, and the interaction between these two factors, were

264 treated as fixed factors in the models. Model assumptions were assessed visually and appropriate  
265 variance structures were specified in the models if they improved the fit, as determined by  
266 likelihood-ratio tests; in general, different variances for each chronosequence and stage  
267 combination were used. We calculated 95% confidence intervals from the generalised least square  
268 models and used those in graphs; the confidence intervals can be used to visually assess statistically  
269 significant differences among means in pairwise comparisons if intervals do not overlap.

270

## 271 **Results**

272

### 273 *Vegetation*

274

275 Vegetation varies markedly along the climosequence, from low stature shrubland in the north to  
276 relatively tall eucalyptus forest in the south (Fig 3A-D). This change in vegetation structure was  
277 reflected in variation in leaf area index, for which maximum values increased from approximately 0.5  
278 or less at Jurien Bay in the drier north to 1.5 at Warren Beach in the wetter south (Fig. 3E). Within  
279 the sequences, leaf area index generally increased in younger stages and declined in the older  
280 stages, although this was less clear for the relatively dry Jurien Bay chronosequence and most  
281 pronounced for the wet Warren Beach chronosequence.

282

### 283 *Pedogenesis along the chronosequences*

284

285 Pedogenesis along all chronosequences followed a similar pattern to that reported previously for the  
286 Jurien Bay chronosequence (Turner & Laliberté, 2015). Young soils developed on Holocene dunes  
287 were greyish, yellowish, or pale brown, with weakly developed surface horizons enriched with  
288 organic matter overlying several meters of unweathered calcareous sand (see Supplementary  
289 Material). All young soils contained carbonate and were strongly or very strongly alkaline. Carbonate  
290 concentrations in the beach sand and youngest soils were greatest at Jurien ( $\geq 80\%$   $\text{CaCO}_3$ ), less at  
291 Guilderton and Yalgorup ( $> 40\%$ ) and least at Warren ( $\leq 5\%$ ) (Table 2). This indicates a gradient of  
292 declining carbonate concentration in modern parent sand from north to south. Despite this, young  
293 soils were of similar strongly alkaline pH throughout the climosequence (Table 2). All soils across the  
294 four chronosequences contained  $> 90\%$  sand (Table 2), predominantly fine, medium, or coarse (0.1 –  
295 1.0 mm), with few very fine or very coarse grains (Table S1). Carbonate concentrations declined with  
296 pedogenesis in all four chronosequences, and was completely absent from stage 4 profiles (Middle  
297 Pleistocene) above the indurated petrocalcic horizons (calcrete). Carbonate depletion occurred  
298 earlier in the surface horizons of the two wetter sequences, being evident in stage 2 profiles at  
299 Yalgorup and Warren (Table 2, Fig. S1), and was almost completely leached from the stage 3 (old  
300 Holocene) dunes at Warren.

301

302 As pedogenesis proceeds and soils begin to acidify the carbonate is progressively leached from the  
303 profiles and precipitated at depth, eventually forming an indurated petrocalcic horizon beneath  
304 residual yellow sands, characteristic of young Spearwood dunes (i.e. 120,000 years old; stage 4).  
305 These soils have brownish yellow subsoil consisting of  $> 95\%$  residual quartz sand. The yellow colour  
306 derives from goethite and the weathering of heavy minerals (Bastian, 1996). Continued pedogenesis  
307 leads to progressive leaching of iron oxides, sometimes forming a Bs horizon, and eventually leaving  
308 bleached quartz sand profiles several meters deep, characteristic of Bassendean dunes (i.e.

309 approximately 2 million years old; stage 6). These oldest soils have extremely low cation exchange  
310 capacity, although base saturation remains high (Table 2).

311

312 The major pedogenic transitions were observed only weakly at Jurien Bay, but were captured clearly  
313 in profiles at Guilderton and Yalgorup (Fig. 4). In particular, the old Quindalup dunes (stage 3) at  
314 Guilderton exhibited a calcic horizon with weakly cemented secondary carbonates and an incipient  
315 undulating petrocalcic horizon (Fig. 4c-e, 4j-k). In contrast, pedogenesis at Warren did not involve  
316 the formation of a petrocalcic horizon, presumably due to the lower carbonate content of the parent  
317 sand and the greater leaching potential. The old Spearwood dunes at Guilderton, Yalgorup, and  
318 Warren all included clear examples of the transition from Spearwood to Bassendean soils, with  
319 gradual leaching of iron oxides leading to the development of deep bleached eluvial (E) horizons  
320 over yellow sand (Fig. 4f-i, 4l-n). Previous studies at Jurien captured only the initial stage of this  
321 process, with a shallow incipient eluvial horizon in the oldest Spearwood dune.

322

### 323 *Soil Taxonomy*

324

325 Profiles along all four sequences did not generally qualify as Inceptisols because the particle size  
326 classes were too coarse for cambic horizons (which require a texture of very fine sand or finer; Table  
327 2). As at Jurien Bay, young soils (stages 1–3; Fig. 4a-c) along all four sequences were classified as  
328 Psamments (Entisols) because of their coarse sandy texture. Due to the nature of the sand, these  
329 young profiles were Quartzipsamments at Warren, but Xeropsamments elsewhere (Table 2). The  
330 Xeropsamments were carbonatic, except the youngest soil at Yalgorup, which contained marginally  
331 insufficient carbonate in the profile. The oldest Holocene soils at Guilderton and Yalgorup did not  
332 qualify as Inceptisols, because the calcic horizons with free secondary carbonates were not within  
333 100 cm of the soil surface. In the Australian Soil Classification System (Isbell 2002), the young  
334 Holocene soils are predominantly Shelly or Arenic Rudosols, while the old Holocene soils are Calcic  
335 or Petrocalcic Tenosols at Guilderton and Yalgorup, and Grey-Orthic Tenosols at Warren.

336

337 Middle and Early Pleistocene soils (stages 4–6; Fig. 4f-i) were Quartzipsamments (Entisols) along all  
338 four sequences due to their deep quartz sand profiles lacking diagnostic horizons in the upper part  
339 of the profiles. The exceptions were the youngest Spearwood soils at Jurien and Yalgorup, which  
340 qualified as Calcic Haploxerepts (Inceptisols) because of the petrocalcic within 150 cm of the soil  
341 surface. The stage 4 profile at Guilderton was similar, with contained a petrocalcic horizon below  
342 yellow sand, but did not qualify as an Inceptisol because the petrocalcic horizon was > 150 cm below  
343 the soil surface. In the Australian Soil Classification system the Middle Pleistocene soils qualify as  
344 Grey or Yellow-Orthic Tenosols, with the younger profiles being in the Petrocalcic Great Group, while  
345 the older soils with a spodic horizon (stages 5b and 6) qualify as Sesquic or Humosesquic Aeric  
346 Podosols.

347

348 Soils from stage 6 (Fig 4i) were morphologically, chemically, and physically similar at each of the four  
349 sequences. The designation as Entisols (i.e. young soils) for these 2-million year profiles is an artifact  
350 of the Soil Taxonomy system, which does not consider parts of the profile deeper than 200 cm  
351 (Turner & Laliberté, 2015). We observed a clear spodic horizon in Bassendean soils only at the  
352 Yalgorup chronosequence, although this indurated coffee rock was too deep (>200 cm) for this  
353 profile to be placed in the Spodosols. An additional profile at Warren, not on the main



354 chronosequence but on Bassendean sand, qualified as a Spodosol due to a spodic horizon within 200  
355 cm of the soil surface (see profile classifications in Supplementary Material). Quartz-rich soils often  
356 contain insufficient metals to yield a spodic horizon and therefore develop into Quartzipsamments  
357 (Fanning & Fanning, 1989), although variation in the presence of a spodic horizon in the Swan  
358 Coastal Plain has also been linked to differences in the proximity to the water table (McArthur and  
359 Russell 1978). In the absence of spodic horizons, the Bassendean profiles qualify as Grey-Orthic-  
360 Tenosols in the Australian Soil Classification System.

361

#### 362 *Organic carbon, total nitrogen, and total phosphorus*

363

364 Profile-weighted organic C and N stocks followed a consistent pattern along chronosequences, but  
365 were variable across the climosequence (Table 3, Fig. S2, Fig. S3). Stocks of both C and N tended to  
366 increase initially to greatest amounts in old Holocene dunes, being as high as 12 kg C m<sup>-2</sup> / 648.5 g N  
367 m<sup>-2</sup> at Yalgorup (Table 3), and then declined to lower amounts on older dunes. However, organic C  
368 was noticeably high in the oldest soil at Guilderton (9.8 kg C m<sup>-2</sup>) compared to the earlier stages of  
369 the sequence.

370

371 Total P stocks in the youngest soils (stage 1) were greatest at Jurien (300 g P m<sup>-2</sup>), lower at  
372 Guilderton and Yalgorup (210–240 g P m<sup>-2</sup>), and lowest at Warren (36 g P m<sup>-2</sup>), reflecting the  
373 carbonate and P content of the parent sand (Table 3, Fig. 5). With the exception of an increasing  
374 total P stock in Holocene dunes at Yalgorup, presumably due to high productivity at the old  
375 Holocene site (reflected in the high organic C stock), total P declined more or less continuously  
376 throughout the chronosequences, reaching extremely low amounts (< 5 g P m<sup>-2</sup>) on the oldest soils  
377 Spearwood and Bassendean soils.

378

379 In surface soils (0-10 cm depth) along all four sequences, organic C in surface soils was lowest in the  
380 youngest chronosequence stage and then increased to reach maximal values in stage 2 or 3, except  
381 for Yalgorup where organic C was also high in the oldest Holocene stage (Fig. 6A). There was a  
382 decline in organic C from stage 3 to 4 in three chronosequences (Jurien Bay, Guilderton and  
383 Yalgorup), while organic C remained constant from stage 3 to 4 in Warren (Fig. 6A). Total nitrogen  
384 followed similar patterns to organic C (Fig. 6B). Total N started at low concentrations in all four  
385 chronosequences, then reached maximal values in stage 2 (Jurien Bay) or stage 3 (all other  
386 chronosequences). Following this increase, there was a decline in total nitrogen from stage 3 or 4 in  
387 all chronosequences (Fig. 6B). In the oldest soils (stage 6), total N reached levels as low as stage 1 for  
388 all sequences except Yalgorup (Fig. 6B).

389

390 In the three sequences from the Swan Coastal Plain (Jurien Bay, Guilderton, Yalgorup), there were  
391 large differences in total P concentrations between the Holocene dunes, which had relatively high  
392 total P concentrations, and the older stages, which had extremely low total P concentrations (Fig.  
393 6C). By contrast, total P concentrations in surface soils at Warren were much lower initially (i.e. in  
394 stage 1) and increased slightly until stage 4, presumably due to plant uplift and concentration in  
395 organic matter at the surface (Laliberté *et al.*, 2012; Turner & Laliberté, 2015), but declined to  
396 extremely low concentrations in stage 6 (Fig. 6C).

397

398 Along all four chronosequence stages there was a clear increase in the proportion of total P present  
399 as organic P during pedogenesis, with organic P reaching almost 100% of surface soil total P in stage  
400 6 for the three wetter sequences (Guilderton, Yalgorup and Warren; Fig. 6D). In general, organic P in  
401 surface soils represented a greater proportion of total P as the climate became cooler and wetter (i.e.  
402 from Jurien Bay to Warren; Fig. 6D).

403  
404 There were marked increases in surface soil N:P ratio from youngest to oldest stage in all  
405 chronosequences (Fig. 6E), eventually reaching high values in the oldest stages (i.e. around 50 or  
406 more). The increase was more pronounced in the three drier Swan Coastal Plain chronosequences,  
407 whereas N:P increased from stage 1 to 2 at Warren but then did not increase further in older soils  
408 (Fig. 6E). Profile-weighted nutrient ratios demonstrated a similar pattern in surface soils (Table 3; Fig.  
409 S4). Overall, C:N, C:P, and N:P ratios increased continuously along all four chronosequences,  
410 reaching highest values on the oldest soils. For profile-weighted ratios, the greatest values were a  
411 C:N ratio of 51.4, C:P ratio of 3764, and N:P ratio of 73.2 in the oldest profile at Guilderton.

#### 412 *Surface soil pH, exchangeable phosphorus, and exchangeable cations*

413  
414  
415 Surface soils in all four chronosequence stages were initially alkaline (pH in 0.01 M CaCl<sub>2</sub> > 7) but  
416 then gradually acidified during pedogenesis (Fig. 7A). Soil pH in surface soils in stage 1 decreased  
417 from the driest to the wettest sequence (i.e. Jurien Bay > Guilderton > Yalgorup > Warren), reflecting  
418 the decline in carbonate concentration of the beach sand from Jurien Bay to Warren (Table 2).  
419 Similarly, soil pH in the oldest stages was highest at Jurien compared to the other sequences.

420  
421 Exchangeable phosphorus determined by extraction with anion-exchange resins was highest in the  
422 youngest soils of the three drier chronosequences and then declined continuously with pedogenesis,  
423 reaching lowest values on the oldest soils (Fig. 7B). In contrast, resin phosphate concentrations at  
424 Warren increased initially in Holocene dunes, then declined on Middle and Early Pleistocene dunes  
425 (Fig. 7B). Overall, resin P concentrations on the oldest dunes were lower at the driest site (Jurien  
426 Bay).

427  
428 In all four chronosequences, effective cation exchange capacity declined in the oldest soils to reach  
429 very low levels (Fig. 7C). However, changes in effective cation exchange capacity during the first  
430 three stages differed among chronosequences. In Jurien Bay, and in Guilderton to a lesser degree,  
431 there was a general decline in effective cation capacity from the youngest to the oldest soil (Fig. 7C).  
432 By contrast, in Yalgorup and Warren, there were increases in effective cation exchange capacity from  
433 stages 1 to 3 prior to the decline in the older soils (Fig. 7C). In all stages of all four chronosequences,  
434 effective cation exchange capacity was largely dominated by Ca irrespective of soil age, while Mg  
435 was the second most important exchangeable cation (Fig. 7C). By contrast, other exchangeable  
436 cations (K, Fe, Mn, Na, and Al) were present in very small amounts (Fig. 7C). Base saturation was >  
437 90% in surface soils throughout the four sequences, only being < 100% in Pleistocene soils (Fig. 7D).

#### 438 439 **Discussion**

440  
441 We define a series of four long-term chronosequences that form a climosequence of  
442 chronosequences in southwestern Australia. The system is unique in terms of its Mediterranean

443 climate and its location in a global biodiversity hotspot (Hopper & Gioia, 2004). These four  
444 chronosequences allow examination of the influence of climate on patterns of pedogenesis and  
445 nutrient status during long-term ecosystem development. Such climate × age systems are  
446 exceedingly rare worldwide – the only comparable framework we are aware of is on the Hawaiian  
447 Islands, where steep rainfall gradients, well-constrained parent material, and uniform vegetation  
448 allow unparalleled control of soil forming factors (Vitousek, 2004).

449

450 Despite relatively large changes in climate, pedogenic change was remarkably consistent along the  
451 four chronosequences, with decalcification in Holocene dunes and leaching of iron oxides from  
452 Middle Pleistocene dunes, yielding bleached quartz sand profiles several meters deep on Early  
453 Pleistocene dunes. These transitions were captured by profiles along the chronosequences,  
454 providing evidence that soil variation in the sandplains is a result of in situ soil development.  
455 Changes in soil nutrients during ecosystem development were also consistent along the four  
456 chronosequences, with increasing N concentrations in young soils, declining concentrations of P and  
457 exchangeable cations in old soils, and increasing soil N:P ratios throughout ecosystem development.  
458 This pattern of soil nutrients therefore corresponds closely with the Walker and Syers (1976) model  
459 of nutrient transformations during pedogenesis. Despite clear effects on vegetation structure (as  
460 reflected by changes in LAI), climate effects on soil nutrients appeared marginal, with the only clear  
461 variation in soil nutrients with climate manifesting in the nature of the soil P pools. Specifically, the  
462 proportion of the soil P present in organic forms was greater, and increased earlier in ecosystem  
463 development, in wetter sites, while resin P concentrations were also greater in old Holocene and  
464 Middle Pleistocene dunes at the wettest site. These differences suggest that greater plant biomass  
465 or productivity maintains P in actively cycling pools, and therefore might buffer against nutrient loss  
466 by leaching (Porder & Chadwick, 2009).

467

468 Vitousek and Chadwick (2013b) describe ‘soil process domains’, in which soil properties change  
469 relatively little despite variation in rainfall. These domains occur between ‘pedogenic thresholds’,  
470 where soil properties change rapidly over across a relatively small variation in rainfall. They  
471 identified three domains for Andisols about 150,000 years old on Hawaii: (i) a low rainfall domain  
472 where evapotranspiration exceeds precipitation and carbonate precipitation dominates; (ii) an  
473 intermediate domain where biological uplift of nutrients buffers against loss by leaching, (iii) a high  
474 rainfall domain where leaching losses dominate. The intermediate rainfall domain on Hawaii occurs  
475 between about 700 and 1700 mm and, based on the results for our Australian climosequence, it  
476 appears that the four chronosequences occupy a single process domain: patterns of nutrient  
477 availability and pedogenesis are relatively similar across the entire climosequence, and precipitation  
478 exceeds potential evapotranspiration only at the most southerly site, and there only marginally (52  
479 mm). The lack of variation in patterns of base cations with climate is probably related in part to the  
480 sandy nature of the soils, with limited formation of clays or secondary minerals following  
481 decalcification. Soil pH and Ca concentrations decline in young soils associated with the depletion of  
482 carbonates, exchangeable Al occurs in trace concentrations, and base saturation is therefore always  
483 high despite low concentrations of base cations. Indeed, once carbonates are depleted from  
484 Holocene soils, and iron oxide coatings leached from the Middle Pleistocene soils, there is essentially  
485 no cation exchange capacity other than on organic matter.

486

487 Vegetation structure varied markedly along the climosequence and within chronosequences. Along  
488 the climosequence, vegetation changed from low-stature shrubland in the drier north to relatively  
489 tall *Eucalyptus* forest in the wetter south. Given that changes in fertility with increasing soil age  
490 appear relatively constant across the four chronosequences, the overall increase in biomass and leaf  
491 area index with increasing rainfall is presumably related to water availability. Patterns in vegetation  
492 along the chronosequences (i.e. during ecosystem development) was consistent with the concept of  
493 retrogression (Wardle *et al.*, 2004), with LAI initially increasing in the early stages of pedogenesis,  
494 and then declining on the oldest soils under strong P limitation. This trend was clearest along the  
495 wetter chronosequences, where maximum LAI also occurred earlier in ecosystem development, and  
496 least clear in the driest chronosequence, where there was no consistent trend in LAI along the  
497 chronosequence. Studies so far at Jurien Bay indicate that P availability constrains ecosystem  
498 processes and favours plant species with high P-use efficiency on the oldest soils (Laliberté *et al.*,  
499 2012; Hayes *et al.*, 2014), consistent with the concept of retrogression (Peltzer *et al.*, 2010), even if  
500 LAI varies little across the chronosequence. For example, the oldest soils are dominated by slow-  
501 growing plant species with long-lived leaves that maintain extremely low foliar P concentrations and  
502 a high resorption efficiency for P (Hayes *et al.*, 2014).

503

504 Ecosystem retrogression therefore appears to be expressed more strongly in the vegetation  
505 structure along wetter chronosequences. Along the Australian climosequence, this variation in  
506 expression of strong P limitation on the plant community might be influenced by corresponding  
507 variation in plant community diversity. Although we have so far not conducted detailed vegetation  
508 assessments along all four chronosequences (but see Zemunik *et al.*, 2015; 2016), our field  
509 observations indicate declining diversity with increasing rainfall, from the hyperdiverse shrubland at  
510 Jurien Bay (Laliberté *et al.*, 2014; Zemunik *et al.*, 2016) to the comparatively low diversity forest at  
511 Warren Beach (Hopper & Gioia, 2004). It has been proposed that ecosystem retrogression is less  
512 likely to occur in diverse plant communities such as lowland tropical forests because there are more  
513 likely to be species that can maintain productivity on low P soils (Kitayama, 2005). For example, the  
514 response of the vegetation to changes in nutrient status linked to long-term pedogenesis is relatively  
515 clear along the Hawaiian Island chronosequence where forests are dominated by a single species of  
516 tree (Vitousek & Farrington, 1997). In contrast, strongly weathered soils at Jurien Bay support a  
517 diverse array of species that exhibit high P-use efficiency and can therefore maintain relatively high  
518 biomass on extremely infertile soils (Hayes *et al.*, 2014; Lambers *et al.*, 2015; Zemunik *et al.*, 2015).  
519 High regional plant diversity might therefore buffer against a decline in productivity related to the  
520 long-term decline in P availability during retrogression (Vitousek, 2004).

521

522 There are two caveats concerning the chronosequences. First, there is variation in the parent sand  
523 along the coastline, with lower carbonate concentrations, and therefore total P concentrations,  
524 towards the south. This regional variation in the chemical composition of beach sand is presumably  
525 related to differences in offshore productivity (McArthur, 2004), although we do not have  
526 information on whether the pattern in modern sand composition also occurred historically. Second,  
527 although we find consistent patterns of soil development along the four chronosequences, we have  
528 not so far been able to precisely quantify dune ages and therefore rates of soil development.  
529 However, the relative dune ages are fairly well constrained, particularly for the Swan Coastal Plain  
530 (see also Turner & Laliberté, 2015), giving confidence that the overall patterns are consistent among  
531 the four chronosequences. In the Spearwood dunes, Bastian (1996) recognised five stages, although

532 at least seven sea level high stands are recognised. Aside from the 120,000 year high stand (Marine  
533 Isotope Stage 5e) that is relatively easy to identify (and consistent among our chronosequences), a  
534 200,000 year high stand was relatively small and likely to have been over-ridden by the subsequent  
535 120,000 year event. Before that, high stands occurred at approximately 220,000, 240,000, 280,000,  
536 330,000, and 410,000 years, so it is likely that Spearwood stages 4 and 5a in our sequences are  
537 separated by at least 100,000 years, but that stages 5a and 5b could be separated by as little as  
538 20,000 years or as much as 190,000 years.

539

540 Despite these limitations, we consider that the series of four long-term retrogressive  
541 chronosequences across a clear climate gradient provides an important model system for studying  
542 long-term soil and ecosystem development, particularly since well-characterised retrogressive  
543 sequences are rare worldwide (Peltzer *et al.*, 2010). These four sequences should be particularly  
544 valuable as strong natural gradients of soil fertility to explore plant adaptations to declining nutrient  
545 availability (e.g. Hayes *et al.*, 2014; Zemunik *et al.*, 2015) and edaphic drivers of plant (Laliberté *et al.*,  
546 2014; Teste *et al.*, 2017) and microbial diversity (Krüger *et al.*, 2015; Albornoz *et al.*, 2016) under  
547 contrasting climates, and to examine the independent influence of climate on above and below  
548 ground organisms while controlling for variation in soil nutrients.

549

#### 550 **Acknowledgements**

551

552 Funding was provided by a Discovery Early Career Researcher Award (DE120100352) and a Discovery  
553 Project (DP130100016) from the Australian Research Council, a Research Collaboration Award from  
554 The University of Western Australia to EL and BLT, and a NSERC Discovery Grant awarded to EL. The  
555 authors thank Dayana Agudo, Pedro Araúz, Aleksandra Bielnicka, and Paola Escobar for laboratory  
556 support, and Felipe Albornoz, Hans Lambers, Kenny Png, François Teste, Karl-Heinz Wyrwoll, and  
557 Graham Zemunik for assistance in the field. Figure 2 was created using base maps provided by the  
558 Department of Agriculture and Food of Western Australia.

559

#### 560 **References**

561

- 562 Albornoz, F.E., Teste, F.P., Lambers, H., Bunce, M., Murray, D.C., White, N.E. & Laliberté, E. 2016.  
563 Changes in ectomycorrhizal fungal community composition and declining diversity along a 2-  
564 million-year soil chronosequence. *Molecular Ecology*, **25**, 4919-4929.
- 565 Bastian, L.V. 1996. Residual soil mineralogy and dune subdivision, Swan Coastal Plain, Western  
566 Australia. *Australian Journal of Earth Sciences*, **43**, 31-44.
- 567 Chadwick, O.A. & Chorover, J. 2001. The chemistry of pedogenic thresholds. *Geoderma*, **100**, 321-  
568 353.
- 569 Chadwick, O.A., Gavenda, R.T., Kelly, E.F., Ziegler, K., Olson, C.G., Elliott, W.C. & Hendricks, D.M.  
570 2003. The impact of climate on the biogeochemical functioning of volcanic soils. *Chemical*  
571 *Geology*, **202**, 195-223.
- 572 Fanning, D.S. & Fanning, M.C.B. 1989. *Soil Morphology, Genesis and Classification*. John Wiley &  
573 Sons, New York.
- 574 Feng, J., Turner, B.L., Lü, X., Chen, Z., Wei, K., Tian, J., Wang, C., Luo, W. & Chen, L. 2016. Phosphorus  
575 transformations along a large-scale climosequence in arid and semiarid grasslands of northern  
576 China. *Global Biogeochemical Cycles*, **30**, 1264-1275.

- 577 Gee, G.W. & Or, D. 2002. Particle size analysis. In: *Methods of Soil Analysis, Part 4 – Physical*  
578 *Methods* (eds. Dane, J.H. & Topp, C.), pp. 255–293. Soil Science Society of America, Madison,  
579 WI.
- 580 Hayes, P., Turner, B.L., Lambers, H. & Laliberté, E. 2014. Foliar nutrient concentrations and  
581 resorption efficiency in plants of contrasting nutrient-acquisition strategies along a 2-million-  
582 year dune chronosequence. *Journal of Ecology*, **102**, 396-410.
- 583 Hendershot, W.H., Lalonde, H. & Duquette, M. 2008. Chapter 18. Ion exchange and exchangeable  
584 cations. In: *Soil Sampling and Methods of Analysis* (eds. Carter, M.R. & Gregorich, E.), pp. 173-  
585 178. Canadian Society of Soil Science and CRC Press, Boca Raton, FL.
- 586 Hopper, S.D. & Gioia, P. 2004. The Southwest Australian Floristic Region: Evolution and conservation  
587 of a global hot spot of biodiversity. *Annual Review of Ecology, Evolution, and Systematics*, **35**,  
588 623-650.
- 589 Isbell, R.F. 2002. *The Australian Soil Classification, Revised Edition*. CSIRO Publishing, Collingwood,  
590 Victoria, Australia.
- 591 Jangid, K., Whitman, W.B., Condrón, L.M., Turner, B.L. & Williams, M.A. 2013. Soil bacterial  
592 community succession during long-term ecosystem development. *Molecular Ecology*, **22**, 3415–  
593 3424.
- 594 Kendrick, G.W., Wyrwoll, K.-H. & Szabo, B.J. 1991. Pliocene-Pleistocene coastal events and history  
595 along the western margin of Australia. *Quaternary Science Reviews*, **10**, 419-439.
- 596 Kitayama, K. 2005. Comment on "Ecosystem properties and forest decline in contrasting long-term  
597 chronosequences". *Science*, **308**, 633.
- 598 Krüger, M., Teste, F.P., Laliberté, E., Lambers, H., Coghlan, M., Zemunik, G. & Bunce, M. 2015. The  
599 rise and fall of arbuscular mycorrhizal fungal diversity during ecosystem retrogression.  
600 *Molecular Ecology*, **24**, 4912-4930.
- 601 Laliberté, E., Grace, J.B., Huston, M.A., Lambers, H., Teste, F.P., Turner, B.L. & Wardle, D.A. 2013.  
602 How does pedogenesis drive plant diversity? *Trends in Ecology & Evolution*, **28**, 331–340.
- 603 Laliberté, E., Turner, B.L., Costes, T., Pearse, S.J., Wyrwoll, K.-H., Zemunik, G. & Lambers, H. 2012.  
604 Experimental assessment of nutrient limitation along a 2-million-year dune chronosequence in  
605 the south-western Australia biodiversity hotspot. *Journal of Ecology*, **100**, 631-642.
- 606 Laliberté, E., Zemunik, G. & Turner, B.L. 2014. Environmental filtering explains variation in plant  
607 diversity along resource gradients. *Science*, **345**, 1602-1605.
- 608 Lambers, H., Clode, P.L., Hawkins, H.-J., Laliberté, E., Oliveira, R.S., Reddell, P., Shane, M.W., Stitt, M.  
609 & Weston, P. 2015. Metabolic Adaptations of the Non-Mycotrophic Proteaceae to Soils With  
610 Low Phosphorus Availability. In: *Annual Plant Reviews Volume 48*, pp. 289-335. John Wiley &  
611 Sons, Inc.
- 612 Loepfert, R.H. & Suarez, D.L. 1996. Carbonate and Gypsum. In: *Methods of Soil Analysis, Part 3 –*  
613 *Chemical Methods* (ed. Sparks, D.L.E.A.), pp. 437-474. Soil Science Society of America Madison,  
614 Wisconsin.
- 615 McArthur, W.M. 2004. *Reference Soils of South-western Australia*. Department of Agriculture (WA),  
616 Perth, Australia.
- 617 McArthur, W.M. & Bettenay, E. 1974. *Development and Distribution of Soils of the Swan Coastal*  
618 *Plain, Western Australia*. Canberra, Australia.
- 619 Peltzer, D.A., Wardle, D.A., Allison, V.J., Baisden, W.T., Bardgett, R.D., Chadwick, O.A., Condrón, L.M.,  
620 Parfitt, R.L., Porder, S., Richardson, S.J., Turner, B.L., Vitousek, P.M., Walker, J. & Walker, L.R.  
621 2010. Understanding ecosystem retrogression. *Ecological Monographs*, **80**, 509-529.

- 622 Pinheiro, J.C. & Bates, D.M. 2000. *Mixed-Effects Models in S and S-PLUS*. Springer, New York, USA.
- 623 Playford, P.E., Cockbain, A.E. & Lowe, G.H. 1976. *Geology of the Perth Basin, Western Australia;*  
624 *Bulletin 124 of the Geological Survey of Western Australia*. Geological Survey of Western  
625 Australia, Perth, Australia.
- 626 Porder, S. & Chadwick, O.A. 2009. Climate and soil-age constraints on nutrient uplift and retention  
627 by plants. *Ecology*, **90**, 623-636.
- 628 Purdie, B., Tille, P. & Schoknecht, N. 2004. *Soil-landscape mapping in south-Western Australia: an*  
629 *overview of methodology and outputs*. Department of Agriculture and Food, Western Australia,  
630 Perth, Australia.
- 631 Selmants, P.C. & Hart, S.C. 2010. Phosphorus and soil development: Does the Walker and Syers  
632 model apply to semiarid ecosystems? *Ecology*, **91**, 474-484.
- 633 Soil Survey Staff. 1999. *Soil Taxonomy: A Basic System of Soil Classification for Making and*  
634 *Interpreting Soil Surveys*. United States Department of Agriculture–Natural Resources  
635 Conservation Service, Lincoln, NE.
- 636 Teste, F.P., Kardol, P., Turner, B.L., Wardle, D.A., Zemunik, G., Renton, M. & Laliberté, E. 2017. Plant-  
637 soil feedback and the maintenance of diversity in Mediterranean-climate shrublands. *Science*,  
638 **355**, 173-176.
- 639 Turner, B.L. & Laliberté, E. 2015. Soil development and nutrient availability along a 2 million-year  
640 coastal dune chronosequence under species-rich Mediterranean shrubland in southwestern  
641 Australia. *Ecosystems*, **18**, 287-309.
- 642 Turner, B.L. & Romero, T.E. 2009. Short-term changes in extractable inorganic nutrients during  
643 storage of tropical rain forest soils. *Soil Science Society of America Journal*, **73**, 1972-1979.
- 644 Vitousek, P. & Chadwick, O. 2013a. Pedogenic thresholds and soil process domains in basalt-derived  
645 soils. *Ecosystems*, **16**, 1379-1395.
- 646 Vitousek, P.M. 2004. *Nutrient Cycling and Limitation*. Princeton University Press, Princeton, New  
647 Jersey.
- 648 Vitousek, P.M. & Chadwick, O.A. 2013b. Pedogenic thresholds and soil process domains in basalt-  
649 derived soils. *Ecosystems*, **16**, 1379-1395.
- 650 Vitousek, P.M. & Farrington, H. 1997. Nutrient limitation and soil development: Experimental test of  
651 a biogeochemical theory. *Biogeochemistry*, **37**, 63-75.
- 652 Walker, T.W. & Adams, A.F.R. 1958. Studies on soil organic matter: I. Influence of phosphorus  
653 content of parent materials on accumulations of carbon, nitrogen, sulfur, and organic  
654 phosphorus in grassland soils. *Soil Science*, **85**, 307-318.
- 655 Walker, T.W. & Syers, J.K. 1976. The fate of phosphorus during pedogenesis. *Geoderma*, **15**, 1-19.
- 656 Wardle, D.A., Walker, L.R. & Bardgett, R.D. 2004. Ecosystem properties and forest decline in  
657 contrasting long-term chronosequences. *Science*, **305**, 509-513.
- 658 Williamson, W.M., Wardle, D.A. & Yeates, G.W. 2005. Changes in soil microbial and nematode  
659 communities during ecosystem decline across a long-term chronosequence. *Soil Biology and*  
660 *Biochemistry*, **37**, 1289-1301.
- 661 Wyrwoll, K.-H., Turner, B.L. & Findlater, P. 2014. On the origins, geomorphology and soils of the  
662 sandplains of south-western Australia. In: *Plant Life on the Sandplains in Southwest Australia, a*  
663 *Global Biodiversity Hotspot* (ed. Lambers, H.). University of Western Australia, Crawley,  
664 Australia.
- 665 Zemunik, G., Turner, B.L., Lambers, H. & Laliberté, E. 2015. Diversity of plant nutrient-acquisition  
666 strategies increases during long-term ecosystem development. *Nature Plants*, **1**.

667 Zemunik, G., Turner, B.L., Lambers, H. & Laliberté, E. 2016. Increasing plant species diversity and  
668 extreme species turnover accompany declining soil fertility along a long-term chronosequence  
669 in a biodiversity hotspot. *Journal of Ecology*, **104**, 792-805.



670 **Figure Legends**

671

672 **Figure 1.** Map of southwestern Australia, showing isolines for annual rainfall (mm year<sup>-1</sup>) and  
673 locations of the four dune chronosequences. Rainfall data are averages from the 1961-1990 period  
674 ([www.bom.gov.au](http://www.bom.gov.au)). The lower panel shows monthly climate data, including precipitation, potential  
675 evapotranspiration, and mean temperature for each chronosequence.

676

677 **Figure 2.** Detailed soil classification maps showing the location of the soil sampling sites along the  
678 four dune chronosequences: (A) Jurien Bay, (B) Guilderton, (C) Yalgorup and (D) Warren. Mapping of  
679 soil systems and subsystems is based on the Western Australian Department of Agriculture soil  
680 classification.

681

682 **Figure 3.** (A-D) Changes in vegetation in the oldest chronosequence stage (i.e. stage 6) for each of  
683 the four chronosequences, and (E) leaf area index (LAI) along the four dune chronosequences. Leaf  
684 area index was not measured on chronosequence stages 5a and 5b. Bar heights represent means ( $n$   
685 = 4) and error bars represent 95% confidence intervals from generalised least-square models  
686 accounting for different variances among chronosequence stages. Means whose error bars do not  
687 overlap can be considered significantly different. Actual values are shown as points. Photo credits: P.  
688 Kardol, E. Laliberté, F. Teste, B. Turner and G. Zemunik.

689

690 **Figure 4.** Soil development along the Guilderton chronosequence: (a) young Holocene dune (~100  
691 years, stage 1), (b) medium-aged Holocene dune with incipient A horizon (~1000 years, stage 2), (c)  
692 old Holocene dune (6500 years, stage 3), (d) precipitation of pedogenic carbonate forming a calcic  
693 horizon in old Holocene dune, (e) surface of a petrocalcic horizon in old Holocene dune, (f) young  
694 Middle Pleistocene dune showing decalcified sand coated with iron oxides (120,000 years, stage 4),  
695 (g) medium-aged Middle Pleistocene dune with incipient E horizon (~250,000 years, stage 5a), (h) old  
696 Middle Pleistocene dune with 1 m deep bleached E horizon (~400,000 years, stage 5b), (i) Early  
697 Pleistocene dune showing bleached quartz sand (~2 million years, stage 6). Fine detail in subsoil of  
698 five profiles showing key pedogenic stages: (j) a mixture of carbonate and quartz sand-sized grains in  
699 young Holocene dune, (k) sand grains cemented by pedogenic carbonate at 150 cm in old Holocene  
700 dune, (l) iron oxide coatings on quartz grains in young Middle Pleistocene dune, (m) quartz grains  
701 cemented by iron oxide at 250 cm in old Middle Pleistocene dune, (n) clean quartz grains leached of  
702 iron oxides in Early Pleistocene dune.

703

704 **Figure 5.** Profile-weighted contents of total P to 100 cm depth along the four dune  
705 chronosequences: (A) Jurien Bay, (B) Guilderton, (C) Yalgorup and (D) Warren. Note the differences  
706 in the x-axis values among chronosequences.

707

708 **Figure 6.** Changes in (A) organic C, (B) total N, (C) total P, (D) proportion of total P present as organic  
709 P, and (E) total N: total P ratio, in surface soils (0-10 cm depth) across the four chronosequences. Bar  
710 heights represent means ( $n = 4$ ) and error bars represent 95% confidence intervals from generalised  
711 least-square models accounting for different variances among chronosequence stages. Means  
712 whose error bars do not overlap can be considered significantly different. Actual values are shown as  
713 points.

714

715 **Figure 7.** Changes in (A) pH (measured in 0.01 M CaCl<sub>2</sub>), (B) resin-extractable P, (C) exchangeable  
716 cations and effective cation exchange capacity (ECEC), and (D) base saturation, in surface soils (0-10  
717 cm depth) across the four chronosequences. In (A), the central horizontal bar in each box shows the  
718 median, the box represents the interquartile range, the whiskers show the location of the most  
719 extreme data points that are still within a factor of 1.5 of the upper or lower quartiles, and the black  
720 points are values that fall outside the whiskers. In B and C, bar heights represent means ( $n = 4$ ) and  
721 error bars represent 95% confidence intervals from generalised least-square models accounting for  
722 different variances among chronosequence stages. Means whose error bars do not overlap can be  
723 considered significantly different. In B, actual values are shown as points.  
724

**Table 1.** Climate at four long-term chronosequences in southwestern Australia.

| Chronosequence <sup>a</sup> | Mean annual temperature (°C) <sup>b</sup> | Monthly mean minimum temperature (°C) <sup>d</sup> | Monthly mean maximum temperature (°C) <sup>e</sup> | Mean annual precipitation (mm) | Potential annual evapotranspiration (mm) <sup>c</sup> | Water balance (mm y <sup>-1</sup> ) | Dry season <sup>f</sup> | Dry season rainfall (mm) | Rainfall November to April (mm) |
|-----------------------------|-------------------------------------------|----------------------------------------------------|----------------------------------------------------|--------------------------------|-------------------------------------------------------|-------------------------------------|-------------------------|--------------------------|---------------------------------|
| Jurien Bay                  | 19.0 (13.1/24.9)                          | 14.4 (9.3 / 19.5)                                  | 24.5 (18.0 / 30.9)                                 | 533.2                          | 1433                                                  | -900                                | October to April        | 116.2 (21.8% of total)   | 89.6 (16.8% of total)           |
| Guilderton                  | 18.4 (11.1 / 25.6)                        | 12.3 (6.2 / 18.3)                                  | 25.2 (17.1 / 33.3)                                 | 653.4                          | 1403                                                  | -750                                | November to April       | 97.1 (14.9% of total)    | 97.1 (14.9% of total)           |
| Yalgorup                    | 17.3 (11.5 / 23.1)                        | 12.3 (7.9 / 16.7)                                  | 23.6 (16.1 / 31.0)                                 | 943.0                          | 1300                                                  | -357                                | December to March       | 65.1 (6.9% of total)     | 153.7 (16.3% of total)          |
| Warren                      | 15.2 (10.1 / 20.3)                        | 11.1 (7.1 / 15.1)                                  | 20.1 (13.7 / 26.5)                                 | 1184.9                         | 1133                                                  | +52                                 | January to February     | 40.4 (3.4% of total)     | 247.7 (20.9% of total)          |

<sup>a</sup> Data from the following Bureau of Meteorology stations: Jurien Bay (009131; 1968–2015), Guilderton Aerodrome (009178; 1996–2015) located 36.6 km from Guilderton, Wokalup (009642; 1951–2015) located 34.7 km from Preston Beach, Pemberton (009592; 1941–2015) located 19 km from Warren Beach.

<sup>b</sup> Mean annual minimum and maximum in parentheses.

<sup>c</sup> Calculated from monthly values from Bureau of Meteorology maps.

<sup>d</sup> Mean monthly minimum and maximum in parentheses. Values are typically between July and August.

<sup>e</sup> Mean monthly minimum and maximum in parentheses. Values are typically between January and February.

<sup>f</sup> Defined as months receiving < 30 mm rainfall, inclusive of stated months.

**Table 2.** Chronosequence stages, taxonomic classes and features, and profile-weighted soil physical and chemical properties for soils along the Jurien Bay, Guilderton, Yalgorup, and Warren chronosequences, southwestern Australia. ECEC, effective cation exchange capacity.

<sup>a</sup> Data on sand size distribution is presented in Table S1.

<sup>b</sup> Data on Jurien Bay profiles from Turner and Laliberté (2015)

| Chronosequence stage          | Soil Taxonomy                                  | Carbonate (%) | Sand <sup>a</sup> (%) | Silt (%) | Clay (%) | pH (H <sub>2</sub> O) | pH (CaCl <sub>2</sub> ) | ECEC (cmol <sub>c</sub> kg <sup>-1</sup> ) | Base sat. (%) |
|-------------------------------|------------------------------------------------|---------------|-----------------------|----------|----------|-----------------------|-------------------------|--------------------------------------------|---------------|
| <b>JURIEN BAY<sup>b</sup></b> |                                                |               |                       |          |          |                       |                         |                                            |               |
| 1                             | Carbonatic, thermic, Typic Xeropsamments       | 82            | 98.2                  | 1.1      | 0.7      | 9.1                   | 8.2                     | 12.93                                      | 100.0         |
| 2                             | Carbonatic, thermic, Typic Xeropsamments       | 66            | 95.9                  | 2.1      | 2.0      | 9.2                   | 8.1                     | 5.52                                       | 99.9          |
| 3                             | Siliceous, thermic, Typic Xeropsamments        | 25            | 96.9                  | 1.4      | 1.6      | 8.9                   | 8.0                     | 5.01                                       | 99.4          |
| 4                             | Sandy, siliceous, thermic, Calcic Haploxerepts | 0             | 94.0                  | 2.9      | 3.1      | 6.9                   | 6.1                     | 1.94                                       | 100.0         |
| 5                             | Thermic, Xeric Quartzipsamments                | 0             | 96.7                  | 1.3      | 2.0      | 6.8                   | 5.7                     | 0.96                                       | 99.9          |
| 6                             | Thermic, Xeric Quartzipsamments                | 0             | 97.3                  | 2.3      | 0.3      | 5.6                   | 4.4                     | 0.98                                       | 97.4          |
| <b>GUILDERTON</b>             |                                                |               |                       |          |          |                       |                         |                                            |               |
| 1                             | Carbonatic, thermic, Typic Xeropsamments       | 45            | 98.6                  | 0.1      | 1.3      | 9.0                   | 7.5                     | 15.12                                      | 100.0         |
| 2                             | Carbonatic, thermic, Typic Xeropsamments       | 49            | 97.7                  | 0.7      | 1.5      | 9.1                   | 7.7                     | 3.04                                       | 100.0         |
| 3                             | Carbonatic, thermic, Typic Xeropsamments       | 38            | 92.3                  | 2.3      | 5.4      | 8.7                   | 7.3                     | 5.15                                       | 100.0         |
| 4                             | Thermic, uncoated, Xeric Quartzipsamments      | 0             | 93.5                  | 2.3      | 4.2      | 6.0                   | 5.2                     | 0.43                                       | 98.6          |
| 5a                            | Thermic, uncoated, Xeric Quartzipsamments      | 0             | 95.1                  | 1.5      | 3.4      | 5.7                   | 4.8                     | 0.19                                       | 87.3          |
| 5b                            | Thermic, uncoated Xeric Quartzipsamments       | 0             | 98.5                  | 0.7      | 0.9      | 5.5                   | 4.7                     | 0.11                                       | 85.6          |
| 6                             | Thermic, uncoated, Xeric Quartzipsamments      | 0             | 98.6                  | 0.6      | 0.8      | 5.6                   | 3.8                     | 0.68                                       | 100.0         |
| <b>YALGORUP</b>               |                                                |               |                       |          |          |                       |                         |                                            |               |
| 1                             | Mixed, thermic, Typic Xeropsamments            | 37            | 98.4                  | 0.6      | 1.0      | 8.6                   | 6.9                     | 3.08                                       | 100.0         |
| 2                             | Carbonatic, thermic, Typic Xeropsamments       | 48            | 96.8                  | 0.4      | 2.8      | 8.6                   | 7.5                     | 3.98                                       | 99.8          |
| 3                             | Carbonatic, thermic, Typic Xeropsamments       | 42            | 94.0                  | 1.5      | 4.5      | 8.9                   | 7.6                     | 7.21                                       | 99.9          |
| 4                             | Sandy, siliceous, thermic, Calcic Haploxerepts | 0             | 97.4                  | 1.2      | 1.3      | 6.8                   | 6.3                     | 1.13                                       | 98.7          |
| 5a                            | Thermic, uncoated, Xeric Quartzipsamments      | 0             | 96.5                  | 2.0      | 1.5      | 6.2                   | 5.0                     | 0.44                                       | 91.5          |
| 5b                            | Thermic, uncoated, Xeric Quartzipsamments      | 0             | 98.0                  | 1.1      | 0.9      | 5.9                   | 4.2                     | 0.16                                       | 84.0          |
| 6                             | Thermic, uncoated, Xeric Quartzipsamments      | 0             | 97.1                  | 2.4      | 0.5      | 5.9                   | 4.1                     | 0.30                                       | 94.3          |
| <b>WARREN</b>                 |                                                |               |                       |          |          |                       |                         |                                            |               |
| 1                             | Thermic, uncoated, Xeric Quartzipsamments      | 4.2           | 99.1                  | 0.5      | 0.4      | 9.2                   | 8.1                     | 3.79                                       | 99.9          |
| 2                             | Thermic, uncoated, Xeric Quartzipsamments      | 1.5           | 99.1                  | 0.3      | 0.6      | 9.0                   | 8.1                     | 2.36                                       | 100.0         |
| 3                             | Thermic, uncoated, Xeric Quartzipsamments      | 0.2           | 97.8                  | 1.7      | 0.5      | 6.2                   | 5.3                     | 1.05                                       | 93.5          |
| 4                             | Thermic, uncoated, Xeric Quartzipsamments      | 0             | 98.9                  | 0.6      | 0.5      | 5.8                   | 4.9                     | 0.35                                       | 80.1          |
| 5a                            | Thermic, uncoated, Xeric Quartzipsamments      | 0             | 98.9                  | 0.6      | 0.6      | 5.9                   | 4.7                     | 0.51                                       | 94.4          |
| 5b                            | Thermic, uncoated, Xeric Quartzipsamments      | 0             | 98.9                  | 0.6      | 0.5      | 5.3                   | 4.2                     | 0.68                                       | 97.2          |
| 6                             | Thermic, uncoated, Xeric Quartzipsamments      | 0             | 98.8                  | 0.7      | 0.5      | 5.3                   | 4.0                     | 0.27                                       | 94.9          |

**Table 3.** Profile weighted nutrient concentrations for the upper 100 cm of soil in profile pits along the Jurien Bay, Guilderton, Yalgorup, and Warren chronosequences, southwestern Australia. Data for the Jurien Bay chronosequence are from Turner & Laliberté (2015).

| Chronosequence stage | Organic C (g m <sup>-2</sup> ) | Total N (g m <sup>-2</sup> ) | Total P (g m <sup>-2</sup> ) | C:N  | C:P    | N:P  |
|----------------------|--------------------------------|------------------------------|------------------------------|------|--------|------|
| <b>JURIEN BAY</b>    |                                |                              |                              |      |        |      |
| 1                    | 8900                           | 495.5                        | 384.3                        | 18.0 | 23.2   | 1.3  |
| 2                    | 14678                          | 763.3                        | 346.4                        | 19.2 | 42.4   | 2.2  |
| 3                    | 17720                          | 362.2                        | 194.8                        | 48.9 | 90.9   | 1.9  |
| 4                    | 3864                           | 166.5                        | 28.8                         | 23.2 | 134.4  | 5.8  |
| 5                    | 2917                           | 119.2                        | 12.7                         | 24.5 | 228.9  | 9.4  |
| 6                    | 4063                           | 117.8                        | 6.4                          | 34.5 | 639.2  | 18.5 |
| <b>GUILDERTON</b>    |                                |                              |                              |      |        |      |
| 1                    | 2165                           | 223.3                        | 240.1                        | 9.7  | 9.0    | 0.9  |
| 2                    | 4284                           | 371.4                        | 136.3                        | 11.5 | 31.4   | 2.7  |
| 3                    | 7282                           | 537.7                        | 198.5                        | 13.5 | 36.7   | 2.7  |
| 4                    | 1500                           | 110.8                        | 14.5                         | 13.5 | 103.3  | 7.1  |
| 5a                   | 1924                           | 102.0                        | 10.9                         | 18.9 | 177.2  | 9.4  |
| 5b                   | 1772                           | 54.3                         | 3.1                          | 32.6 | 565.6  | 17.3 |
| 6                    | 9801                           | 190.7                        | 2.6                          | 51.4 | 3764.4 | 73.2 |
| <b>YALGORUP</b>      |                                |                              |                              |      |        |      |
| 1                    | 3324                           | 224.5                        | 210.0                        | 14.8 | 15.8   | 1.1  |
| 2                    | 6030                           | 503.0                        | 219.5                        | 12.0 | 27.5   | 2.3  |
| 3                    | 12162                          | 648.6                        | 277.7                        | 18.7 | 43.8   | 2.3  |
| 4                    | 4922                           | 200.8                        | 31.4                         | 24.5 | 156.9  | 6.4  |
| 5a                   | 3336                           | 117.5                        | 6.6                          | 28.4 | 508.7  | 17.9 |
| 5b                   | 6153                           | 151.8                        | 4.3                          | 40.5 | 1434.8 | 35.4 |
| 6                    | 5430                           | 181.0                        | 5.6                          | 30.0 | 976.7  | 32.6 |
| <b>WARREN</b>        |                                |                              |                              |      |        |      |
| 1                    | 188                            | 47.9                         | 35.6                         | 3.9  | 5.3    | 1.3  |
| 2                    | 2055                           | 145.7                        | 23.0                         | 14.1 | 89.2   | 6.3  |
| 3                    | 3337                           | 239.5                        | 18.4                         | 13.9 | 181.4  | 13.0 |
| 4                    | 1925                           | 99.4                         | 11.4                         | 19.4 | 169.5  | 8.8  |
| 5a                   | 2820                           | 148.3                        | 4.4                          | 19.0 | 636.3  | 33.5 |
| 5b                   | 3932                           | 140.2                        | 4.5                          | 28.0 | 869.0  | 31.0 |
| 6                    | 2675                           | 74.1                         | 2.3                          | 36.1 | 1141.1 | 31.6 |

Figure 1

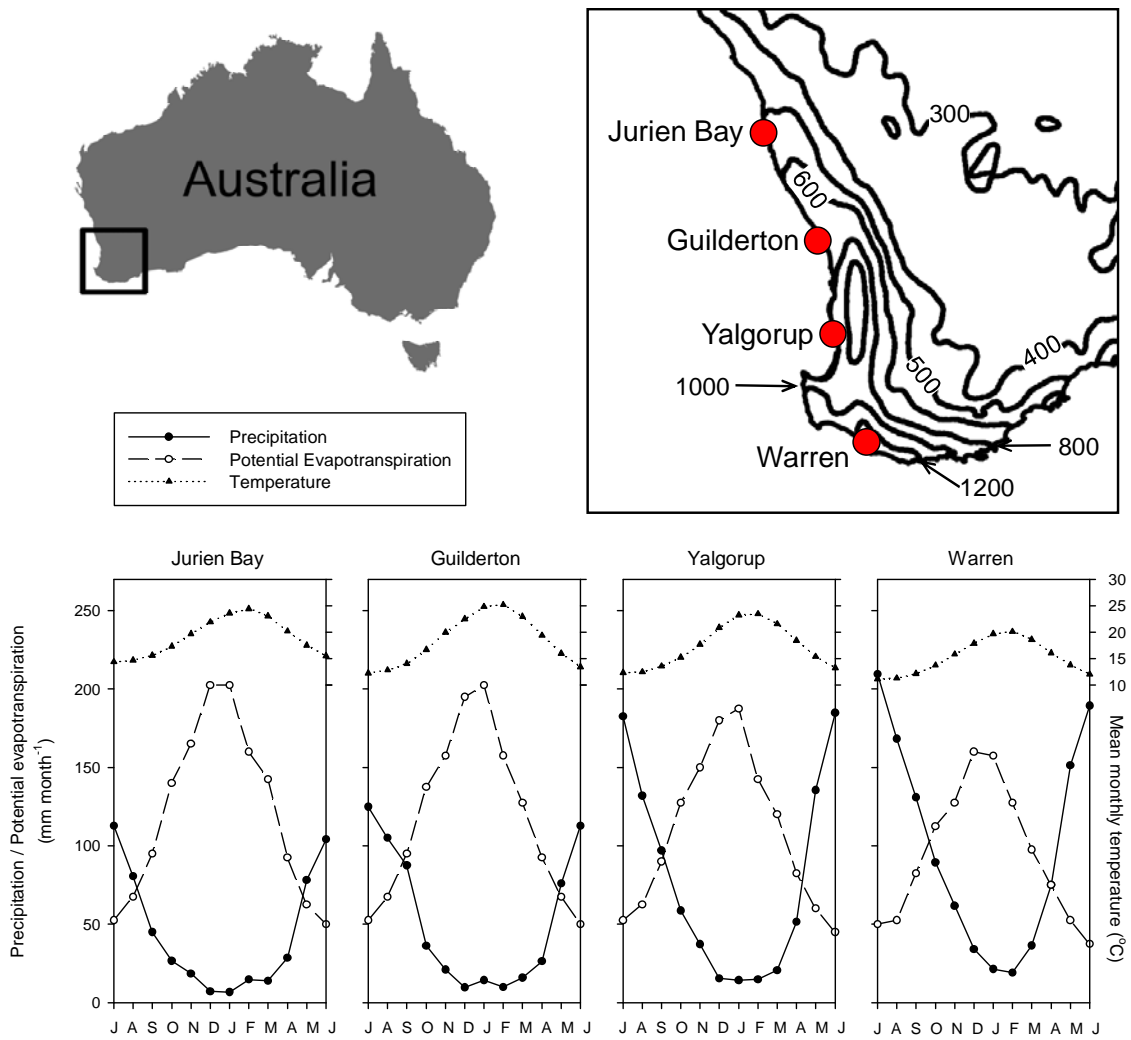

Figure 2

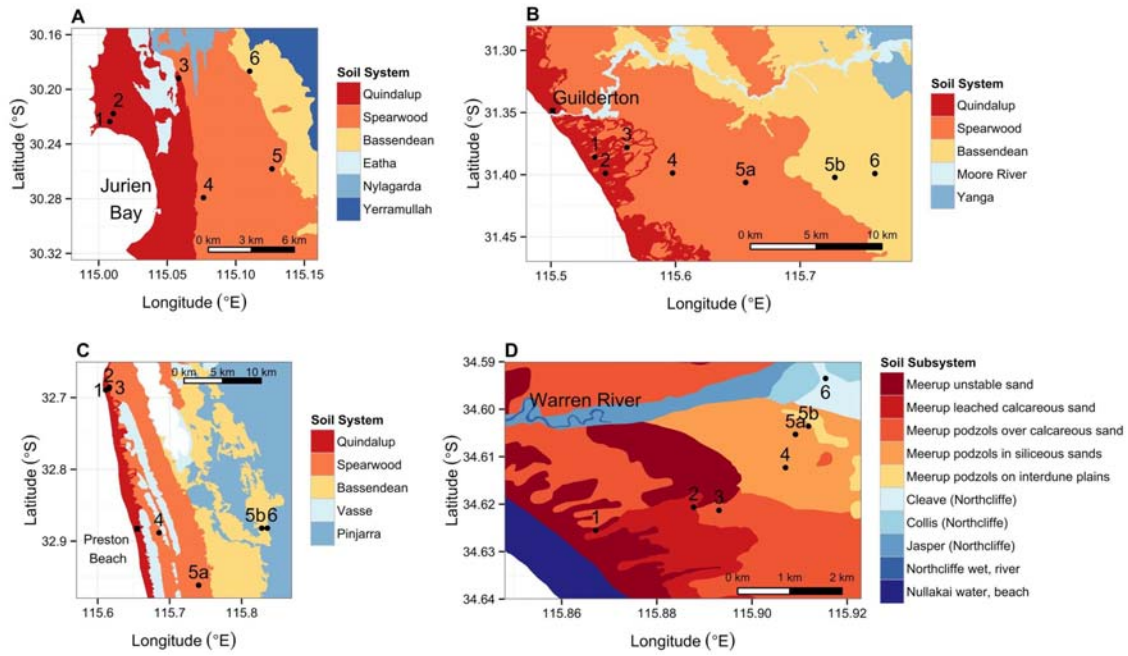

Figure 3

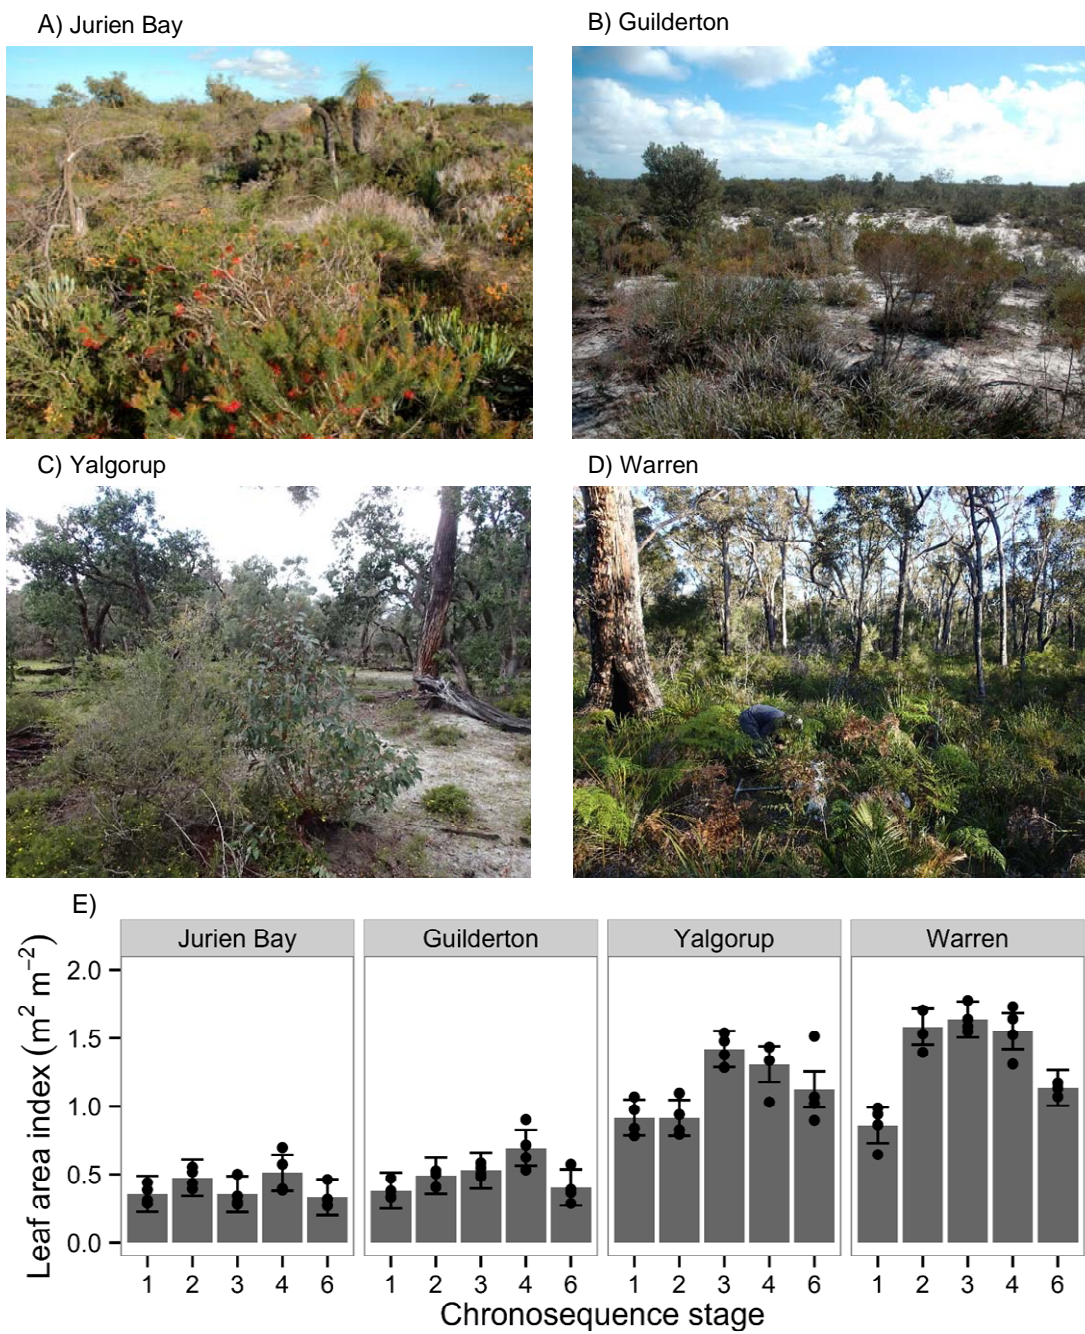



Figure 4

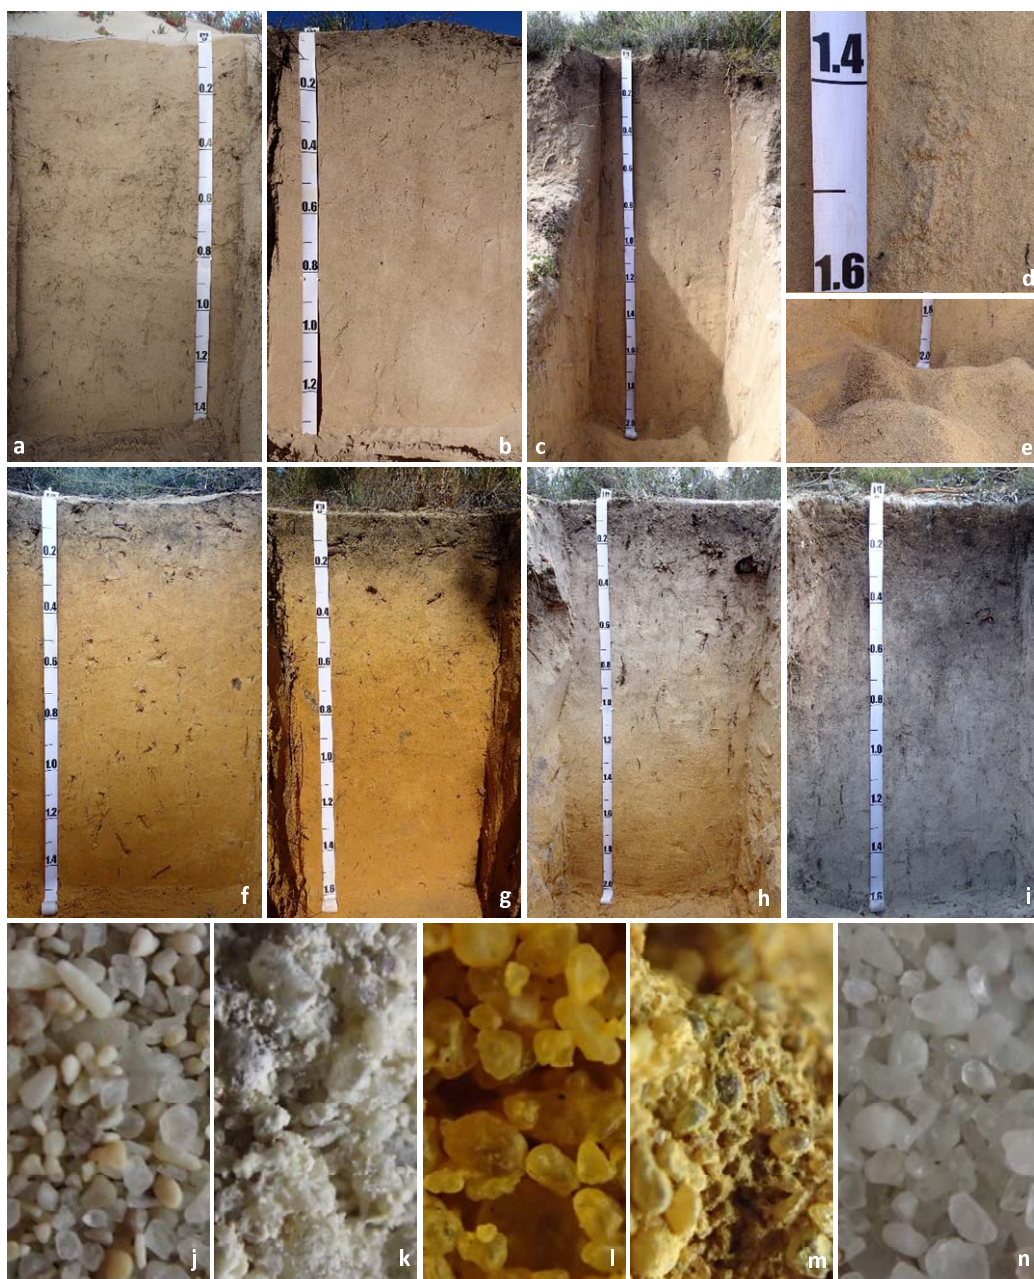

Figure 5

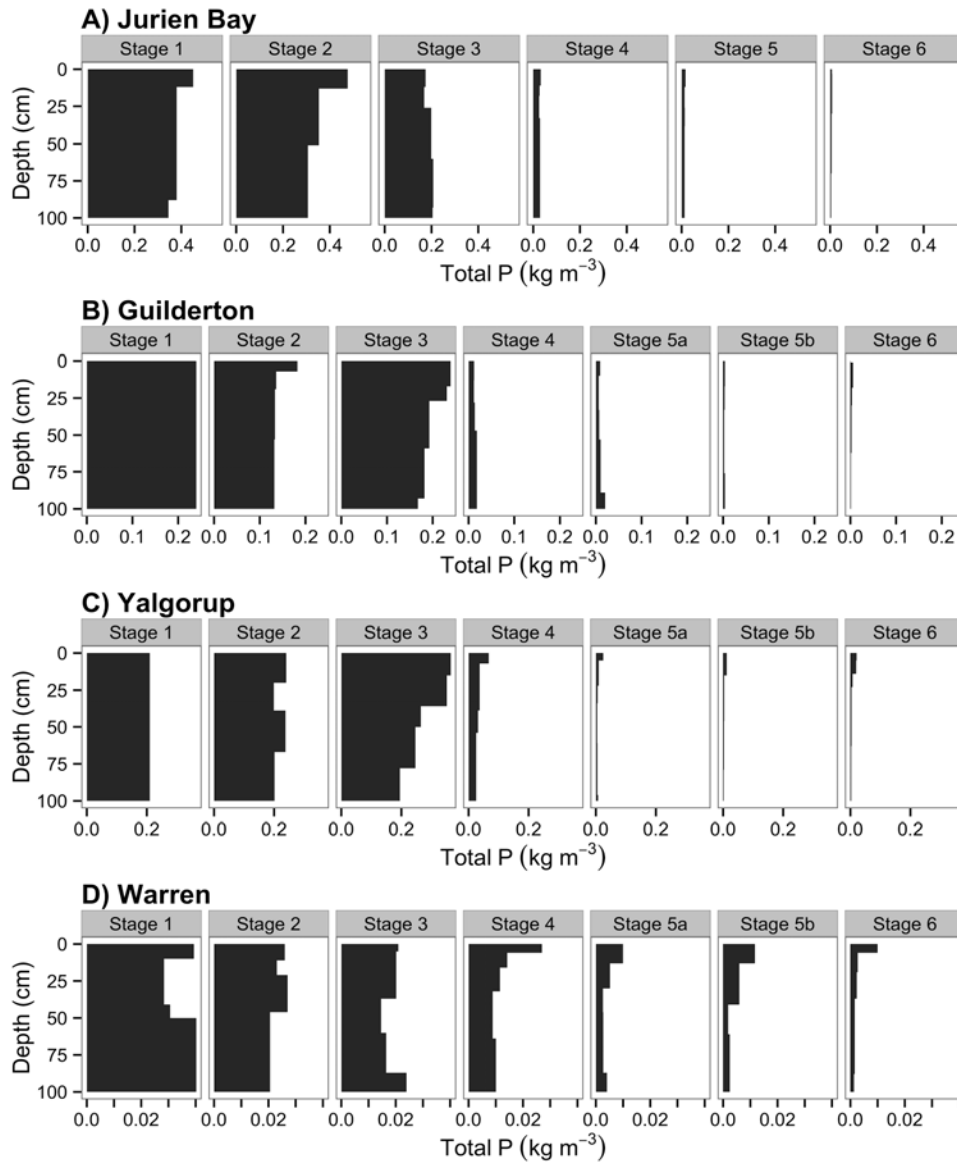

Figure 6

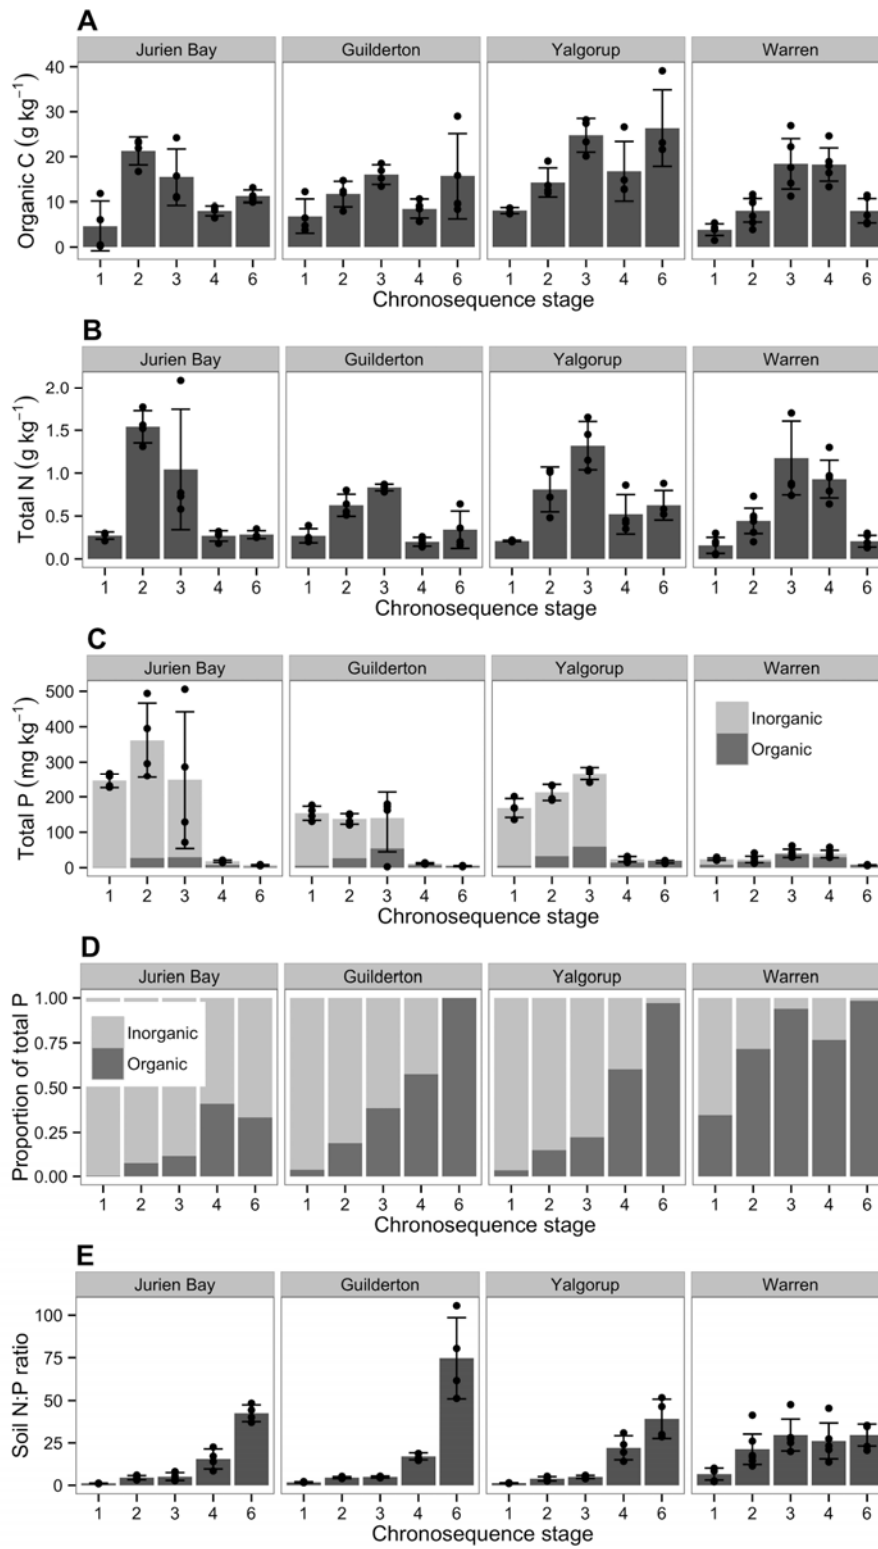

Figure 7

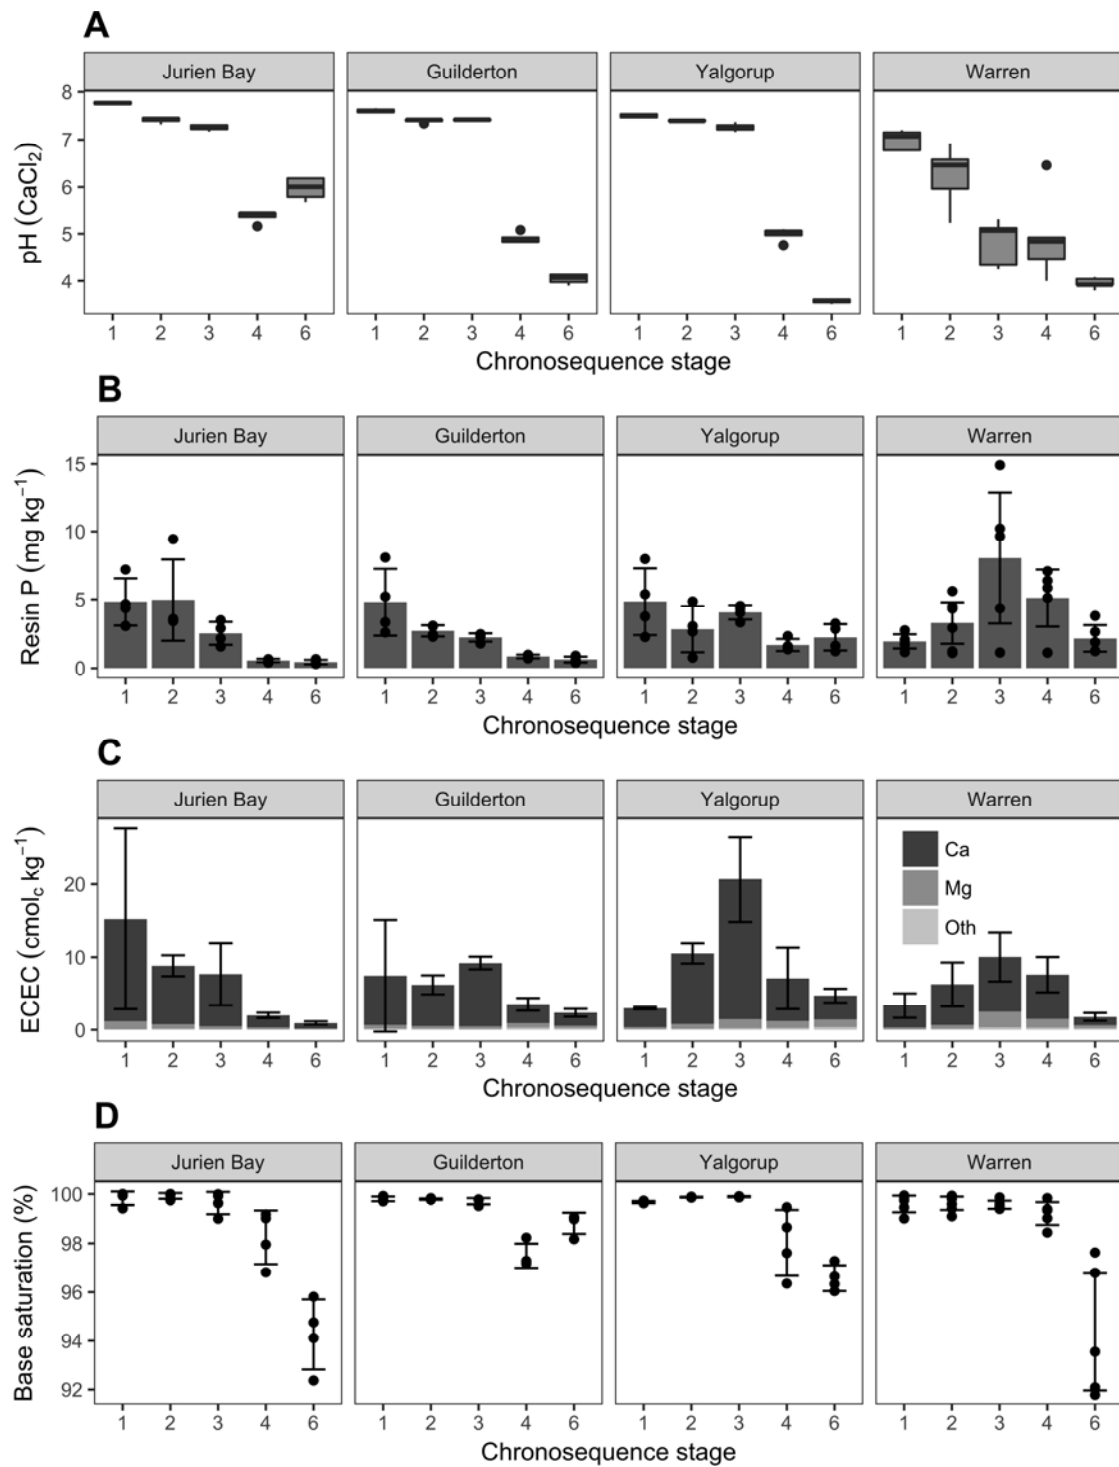

Source: https://www.biorxiv.org/content/10.1101/113308v2.full.pdf
